# Supplementary material for: α-proteobacteria synthesize biotin precursor pimeloyl-ACP using BioZ 3-ketoacyl-ACP synthase and lysine catabolism
Source: PubMed Central journal article supplement (PMC7645780; doi:10.1038/s41467-020-19251-5), 2020-11-05
Supplement: 41467_2020_19251_MOESM1_ESM.pdf [file 41467_2020_19251_MOESM1_ESM.pdf]

Supplementary Information to:

## **$\alpha$ -Proteobacteria Synthesize Biotin Precursor Pimeloyl-ACP Using the BioZ 3-Ketoacyl-ACP Synthase and Lysine Catabolism.**

Yuanyuan Hu and John E. Cronan

**Supplementary Table 1.** Oligonucleotide primers

| Primer (5'-3')   | Sequence                              |
|------------------|---------------------------------------|
| A.t bioZ-Nco     | ATTCCATGGTGATGCAGACACGTTCTTCC         |
| A.t bioZ-Pst     | TATCTGCAGTTAGACGCGATAAACCAC           |
| A.t bioZ-Nde     | TAACATATGCAGACACGTTCTTCCC             |
| A.t bioZ-Xho     | TATCTCGAGTTAGACGCGATAAACCAC           |
| A.t bioZ C115S F | ATCGATCTTGCCGGGGCCTCCTCCGGGTTTCTTTATG |
| A.t bioZ C115S R | CATAAAGAAACCCGGAAGGGGCCCGCAAGATCG     |
| B.a bioZ-NdeI    | ATACATATGACGGTCTGTTCCAG               |
| B.a bioZ-HindIII | TATAAAGCTTTCATACCTGCATCAGCAC          |
| B.a bioZ-NcoI    | ATTCCATGGTGATGACGGTCTGTTCCAG          |
| M.j bioZ-Pci     | ATTACATGTTGATGAGCAAGTCGTCGCGCATTC     |
| M.j bioZ-Hind    | TTAAAGCTTCTAAATTCCAACGACGAGCGCAC      |
| M.j bioZ-NdeI    | TAACATATGAGCAAGTCGTCGCGC              |
| R.m bioZ- NdeI   | ATTCATATGTTGCCTGAACAGTCC              |
| R.m bioZ-HindIII | ATAAAGCTTACCATTGGATCAGCAC             |
| R.m bioZ-NcoI    | ATTCCATGGTGATGTTGCCTGAACAGTCC         |
| M.h bioZ-NcoI    | ATTCCATGGTGAGCACGGCAGGC               |
| M.h bioZ-Hinstop | ATAAAGCTTCTACCAGCGCAGCACCG            |
| M.h bioZ-NdeI    | ATACATATGGTGAGCACGGCAGGC              |
| S.f bioZ-Nco     | ATTCCATGGTGAGTACCATTGCTCCTCC          |
| S.f bioZ-Hin     | ATTAAGCTTCTAAAGTCCGACGACCACC          |
| A.t fabH-PciI    | TAAACATGTATGATCCGCTCTATAGTCCG         |
| A.t fabH-Hin     | TATAAAGCTTTTACCAGCGCAGCAGC            |
| B.a fabH-PciI    | ATTACATGTTGATGATAAGATCTGTCGTACGGGGTA  |
| B.a fabH-Pst     | TATCTGCAGTTACCAGCGCACAAGAACCG         |

|                     |                                            |
|---------------------|--------------------------------------------|
| R.m fabH-Nco        | ATTCCATGGT <u>GATGCCCTACGCAGCCATTACTTC</u> |
| R.m fabH-Hin        | TATA <u>AAGCTTT</u> CAGGGGTTTGTGGTGGACG    |
| M.h fabH-Nco        | AGTCCATGGCCGCAGGGCTC                       |
| M.h fabH-Hin        | ATA <u>AAGCTT</u> ACGCTTACCTCCGTACCAG      |
| S.f fabH-Nde        | ATACATATGATCCGTTCTGTCGTTTCG                |
| S.f fabH-Hind       | TATA <u>AAGCTTTT</u> ACCAGCGGATGAGAAC      |
| E.c fabH-Pcil       | AATACATGTATACGAAGATTATTGGTACTGGC           |
| E.c fabH-Hin        | AATA <u>AAGCTT</u> AGAAACGAACCAGCG         |
| A.t bioZKO Eco      | AATGAATTCTTATTCGGATAGCGGTTCAACGGCG         |
| A.t bioZKO upR      | TGTCAGGACTTTCGCAATGGTC TGG                 |
| A.t bioZKO downF    | AAGTCCTGACATAATAAGCCCACCCTTAGCAATTGC       |
| A.t bioZKO Pst      | TTACTGCAGCCTTCAACCGGACAAGGCAGC             |
| A.t fabH insert Eco | ATCGAATTCCGACATGCAGGCCGTCTG                |
| A.t fabH insert Pst | TATCTGCAGTCCCGGCCTTCCATGC                  |
| A.t caiBKO Pst      | ATACTGCAGATGATGAATGAGCCGACCGATAAC          |
| A.t caiBKO upR      | TTTATCTCATGGACTTATTCGGTTTC                 |
| A.t caiBKO dwnF     | ATGAAGGCAGGAATGAAAAGAACTG                  |
| A.t caiBKO Hin      | TATA <u>AAGCTT</u> CACATTGGCCTCGATCCAGTC   |

The restriction sides used for insertion into the various vector sites (generally NcoI or NdeI for the upstream sequences and HindIII, PstI or SalI for the downstream) are underlined.

**Supplementary Table 2. Bacterial Strains**

| Strains | Strain description                                                                                                         | Reference    |
|---------|----------------------------------------------------------------------------------------------------------------------------|--------------|
|         | <i>E. coli</i> K-12 strains (all are MG1655 derivatives, except ER90, R878 & NRD25)                                        |              |
| MG1655  | wild type strain                                                                                                           | CGSC         |
| R878    | <i>bioC23</i>                                                                                                              | CGSC         |
| STL23   | $\Delta bioC::FRT$                                                                                                         | <sup>1</sup> |
| STL24   | $\Delta bioH::FRT$                                                                                                         | <sup>1</sup> |
| STL25   | $\Delta bioC::FRT \Delta bioH::FRT$                                                                                        | <sup>1</sup> |
| YUAN230 | pCY125/ $\Delta bioC::FRT \Delta bioH::FRT$ pBR329 carrying the <i>bioABFCD</i> operon with in-frame <i>bioC</i> deletion. | <sup>1</sup> |
| YUAN090 | pBAD322C/ $\Delta bioC::FRT$                                                                                               | This study   |
| YUAN091 | pBAD322C/ $\Delta bioH::FRT$                                                                                               | This study   |
| YUAN092 | pBAD322C/ $\Delta bioC::FRT \Delta bioH::FRT$                                                                              | This study   |
| YUAN139 | pBAD322C- <i>AtbioZ</i> / $\Delta bioC::FRT$                                                                               | This study   |
| YUAN140 | pBAD322C- <i>AtbioZ</i> / $\Delta bioH::FRT$                                                                               | This study   |
| YUAN141 | pBAD322C- <i>AtbioZ</i> $\Delta bioC::FRT \Delta bioH::FRT$                                                                | This study   |
| YUAN097 | pBAD322C- <i>BabioZ</i> / $\Delta bioC::FRT$                                                                               | This study   |
| YUAN098 | pBAD322C- <i>BabioZ</i> / $\Delta bioH::FRT$                                                                               | This study   |
| YUAN099 | pBAD322C- <i>BabioZ</i> / $\Delta bioC::FRT \Delta bioH::FRT$                                                              | This study   |
| YUAN148 | pBAD322A- <i>MjbioZ</i> / $\Delta bioC::FRT$                                                                               | This study   |
| YUAN149 | pBAD322A- <i>MjbioZ</i> / $\Delta bioH::FRT$                                                                               | This study   |
| YUAN150 | pBAD322A- <i>MjbioZ</i> / $\Delta bioC::FRT \Delta bioH::FRT$                                                              | This study   |
| YUAN125 | pBAD322C- <i>MhbioZ</i> / $\Delta bioC::FRT$                                                                               | This study   |
| YUAN126 | pBAD322C- <i>MhbioZ</i> / $\Delta bioH::FRT$                                                                               | This study   |
| YUAN127 | pBAD322C- <i>MhbioZ</i> / $\Delta bioC::FRT \Delta bioH::FRT$                                                              | This study   |
| YUAN111 | pBAD322C- <i>RmbioZ</i> / $\Delta bioC::FRT$                                                                               | This study   |
| YUAN112 | pBAD322C- <i>RmbioZ</i> / $\Delta bioH::FRT$                                                                               | This study   |
| YUAN113 | pBAD322C- <i>RmbioZ</i> / $\Delta bioC::FRT \Delta bioH::FRT$                                                              | This study   |
| YUAN214 | pBAD322C- <i>SfbioZ</i> / $\Delta bioC::FRT$                                                                               | This study   |
| YUAN215 | pBAD322C- <i>SfbioZ</i> / $\Delta bioH::FRT$                                                                               | This study   |
| YUAN216 | pBAD322C- <i>SfbioZ</i> / $\Delta bioC::FRT \Delta bioH::FRT$                                                              | This study   |
| YUAN301 | pBAD322C- <i>AtfabH</i> / $\Delta bioC::FRT$                                                                               | This study   |

|                       |                                                                                                                 |              |
|-----------------------|-----------------------------------------------------------------------------------------------------------------|--------------|
| YUAN302               | pBAD322C- <i>AtfabH</i> / $\Delta$ <i>bioH</i> ::FRT                                                            | This study   |
| YUAN303               | pBAD322C- <i>AtfabH</i> / $\Delta$ <i>bioC</i> ::FRT $\Delta$ <i>bioH</i> ::FRT                                 | This study   |
| YUAN104               | pBAD322C- <i>BafabH</i> / $\Delta$ <i>bioC</i> ::FRT                                                            | This study   |
| YUAN105               | pBAD322C- <i>BafabH</i> / $\Delta$ <i>bioH</i> ::FRT                                                            | This study   |
| YUAN106               | pBAD322C- <i>BafabH</i> / $\Delta$ <i>bioC</i> ::FRT $\Delta$ <i>bioH</i> ::FRT                                 | This study   |
| YUAN132               | pBAD322C- <i>MhfabH</i> / $\Delta$ <i>bioC</i> ::FRT                                                            | This study   |
| YUAN133               | pBAD322C- <i>MhfabH</i> / $\Delta$ <i>bioH</i> ::FRT                                                            | This study   |
| YUAN134               | pBAD322C- <i>MhfabH</i> / $\Delta$ <i>bioC</i> ::FRT $\Delta$ <i>bioH</i> ::FRT                                 | This study   |
| YUAN118               | pBAD322C- <i>RmfabH</i> / $\Delta$ <i>bioC</i> ::FRT                                                            | This study   |
| YUAN119               | pBAD322C- <i>RmfabH</i> / $\Delta$ <i>bioH</i> ::FRT                                                            | This study   |
| YUAN120               | pBAD322C- <i>RmfabH</i> / $\Delta$ <i>bioC</i> ::FRT $\Delta$ <i>bioH</i> ::FRT                                 | This study   |
| BL21 (DE3)            | F- <i>ompT hsdSB gal dcm</i> (DE3)                                                                              | Invitrogen   |
| YUAN235               | pET28b- <i>EcfabH</i> / BL21 (DE3)                                                                              | Lab stock    |
| YUAN220               | pET16b- <i>EcfabG</i> / BL21 (DE3)                                                                              | Lab stock    |
| YUAN222               | pET16b- <i>EcfabA</i> / BL21 (DE3)                                                                              | Lab stock    |
| YUAN221               | pET16b- <i>EcfabI</i> / BL21 (DE3)                                                                              | Lab stock    |
| STL9                  | pET28b- <i>EcbioA</i> / BL21 (DE3)                                                                              | <sup>2</sup> |
| STL12                 | pET28b- <i>EcbioD</i> / BL21 (DE3)                                                                              | <sup>2</sup> |
| STL14                 | pET28b- <i>EcbioH</i> / BL21 (DE3)                                                                              | <sup>2</sup> |
| STL13                 | pET28b- <i>EcbioF</i> / BL21 (DE3)                                                                              | <sup>2</sup> |
| YFJ239                | pYFJ84 (pET16- <i>aasS</i> )/ BL21 (DE3) pLysS                                                                  | <sup>3</sup> |
| YUAN236               | pET28b- <i>sfp</i> / BL21 (DE3)                                                                                 | This study   |
| YUAN225               | pJT94 (pDHC30- <i>acpH</i> ) /DK574                                                                             | This study   |
| YUAN226               | pJT93 (pDHC30- <i>acpS</i> ) / DK574                                                                            | This study   |
| YUAN170               | pET28b- <i>AtbioZ</i> / BL21 (DE3)                                                                              | This study   |
| YUAN174               | pET28b- <i>MlbioZ</i> / BL21 (DE3) Tuner                                                                        | This study   |
| YUAN395               | pET28b- <i>SfbioZ</i> / BL21 (DE3) Tuner                                                                        | This study   |
| YUAN299               | pET28b- <i>AtfabH</i> / BL21 (DE3) Tuner                                                                        | This study   |
| YUAN435               | pET28b- <i>SffabH</i> / BL21 (DE3) Tuner                                                                        | This study   |
| YUAN393               | pET30a- <i>AtcaiB</i> / BL21 (DE3) Tuner                                                                        | This study   |
| YUAN515               | pET28b- <i>acpP</i> -Strep-tag, pJT94/ BL21(DE3)                                                                | This study   |
| BL21 Rosetta<br>pLysS | F <sup>-</sup> <i>ompT hsdSB</i> ( $\Gamma_B^-$ $m_B^-$ ) <i>gal dcm</i> (DE3)<br>pLysSRARE (Cam <sup>R</sup> ) | Novagen      |

|         |                                                                                                                |              |
|---------|----------------------------------------------------------------------------------------------------------------|--------------|
|         |                                                                                                                |              |
| YUAN161 | pET30a/ BL21 Rosetta pLysS                                                                                     | This study   |
| YUAN168 | pET30a- <i>BabioZ</i> / BL21 Rosetta pLysS                                                                     | This study   |
| YUAN182 | pET30a- <i>MhbioZ</i> / BL21 Rosetta pLysS                                                                     | This study   |
| YUAN178 | pET30a- <i>RmbioZ</i> / BL21 Rosetta pLysS                                                                     | This study   |
| YUAN190 | pET30a- <i>MhfabH</i> / BL21 Rosetta pLysS                                                                     | This study   |
| YUAN188 | pET30a- <i>RmfabH</i> / BL21 Rosetta pLysS                                                                     | This study   |
| ER90    | MC1061 <i>bioF</i> inactivated by Cm cassette insertion<br>polar inactivation of <i>bioC</i> and <i>bioD</i> . | <sup>5</sup> |
| NRD25   | MC1061 $\Delta(bioABFCD)$                                                                                      | Lab stock    |
| STL108  | MG1655 $\Delta bioF bioH::Kan$                                                                                 | <sup>2</sup> |
|         | <u><i>A. tumefaciens</i> C58 strains (except FYJ212)</u>                                                       |              |
| C58     | Wild type strain                                                                                               | S. Farrand   |
| YUAN371 | $\Delta bioZ$                                                                                                  | This study   |
| YUAN399 | <i>bioZC115S</i>                                                                                               | This study   |
| YUAN373 | <i>fabH::pK19mobsacB</i>                                                                                       | This study   |
| YUAN405 | $\Delta caiB$                                                                                                  | This study   |
| YUAN409 | pSRKGm/ $\Delta bioZ$                                                                                          | This study   |
| YUAN419 | <i>fabH::pK19mobsacB</i>                                                                                       | This study   |
| YUAN411 | pSRKGm- <i>AtbioZ</i> / $\Delta bioZ$                                                                          | This study   |
| YUAN413 | pSRKGm- <i>BabioZ</i> / $\Delta bioZ$                                                                          | This study   |
| YUAN415 | pSRKGm- <i>SfbioZ</i> / $\Delta bioZ$                                                                          | This study   |
| FYJ212  | <i>A. tumefaciens</i> NTL4 $\Delta bioR$                                                                       | <sup>6</sup> |

FRT is the flip recombination site. CGSC is the Coli Genetic Stock Center (Yale).

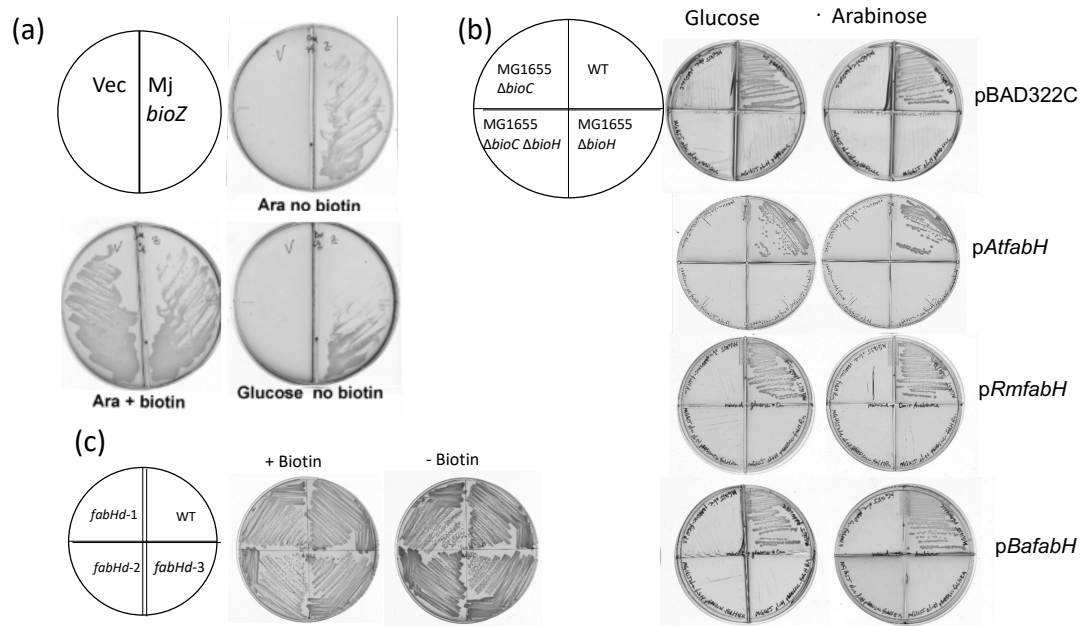

**Supplementary Fig 1.** (a) Complementation of *bioC23* strain R878 with *M. japonicum bioZ*. The gene was expressed from an arabinose promoter (Vec denotes the empty vector) (b) Failure of *fabH* plasmids to complement *E. coli* MG1655  $\Delta bioC$ ,  $\Delta bioC \Delta bioH$  or *bioH* mutant strains. (c) *A. tumefaciens fabH* disruption strains do require biotin for growth Three colonies were streaked. WT denotes the wild type strain.

Imidazole concentrations (in mM): E1, 62.5; E2, 125; E3, 250 and E4, 500.

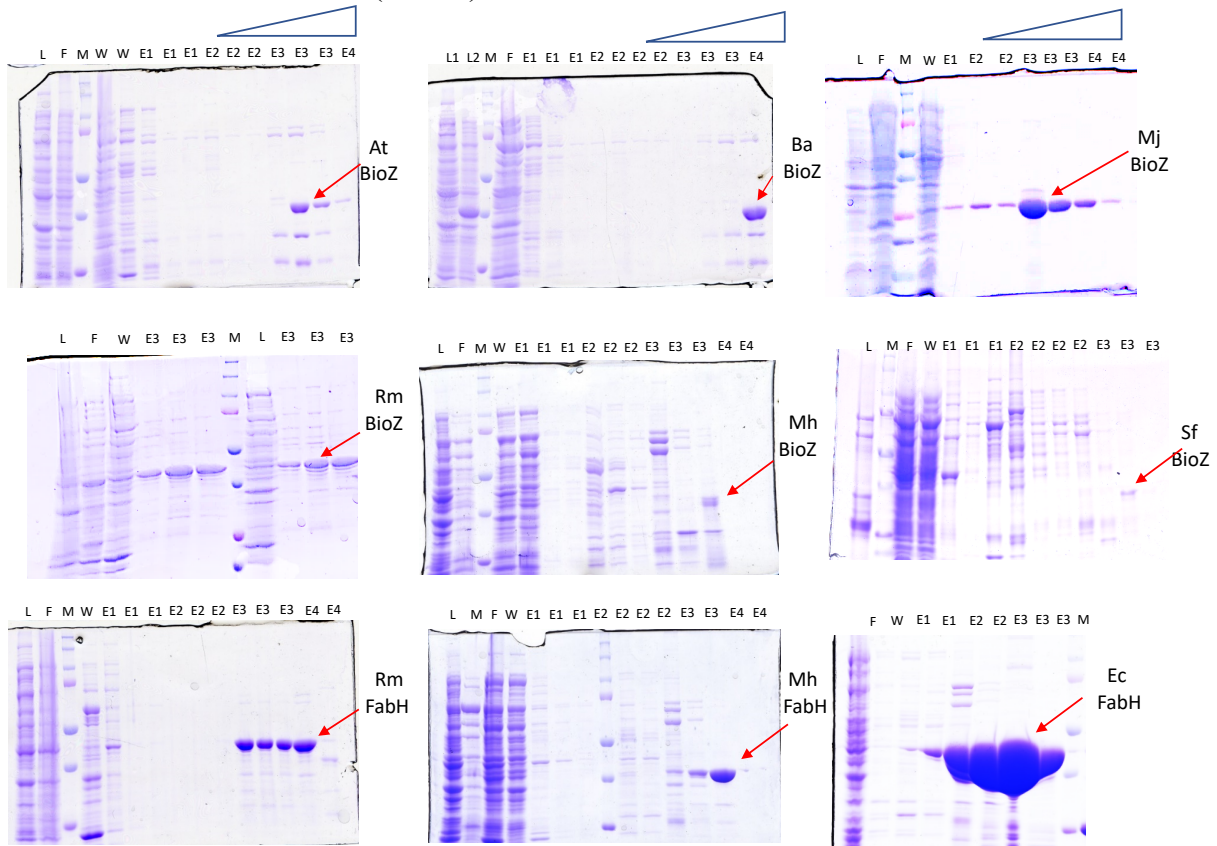

**Supplementary Fig. 2. Purification of BioZ proteins and *E. coli* (Ec) FabH.** Sodium dodecyl sulfate gels of representative fractions eluted from the nickel chelate columns are shown in the right-hand lanes of the gels whereas the left-hand lanes show uninduced and induced extracts, a molecular weight standard and early eluate fractions, respectively. The red arrows denote the final purified protein. L-lysate, F-flowthrough, M-protein ladder, W-wash, E1-elution at 8% buffer B, contains final concentration of 62.5 mM imidazole, E2-elution at 16% buffer B, contains final concentration of 125 mM imidazole, E3-elution at 50% buffer B, contains final concentration of 250 mM imidazole, E4-elution at 100% buffer B, contains final concentration of 500 mM imidazole. The imidazole gradients are depicted by the triangles at the top of the figure. The protein bands below the At and Ba BioZ bands are heat shock chaperones that copurify with BioZ. Strain abbreviations as in Fig. 2.

| Primer                                                                                                   | Product                                                                                               |
|----------------------------------------------------------------------------------------------------------|-------------------------------------------------------------------------------------------------------|
| <b>Acetyl-CoA</b><br>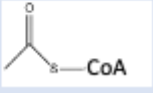   | <b>butyryl-</b><br>  |
| <b>Malonyl-CoA</b><br>  | <b>Glutaryl-</b><br> |
| <b>Glutaryl-CoA</b><br> | <b>Pimeloyl-</b><br> |
| <b>Malonyl-ACP</b><br>  | <b>Pimeloyl-</b><br> |

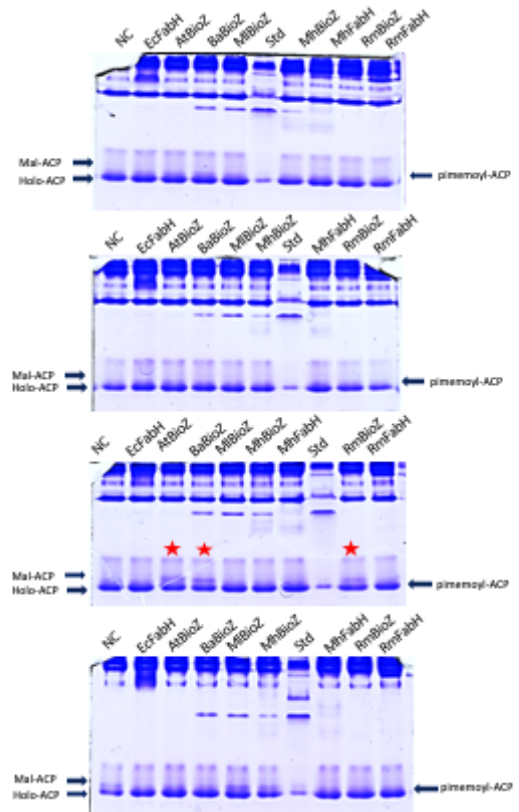

**Supplementary Fig. 3. Gel-shift analyses of BioZ *in vitro* reactions with *E. coli* fatty acid biosynthesis proteins.** Testing of various primer substrates in BioZ-catalyzed condensation with malonyl-ACP. BioZ condensed malonyl-ACP with glutaryl-CoA, but not with acetyl-CoA, malonyl-CoA or malonyl-ACP. The red asterisk denote reactions in which pimeloyl-ACP was produced. Each experiment was repeated >3 times and the gels given are representative.



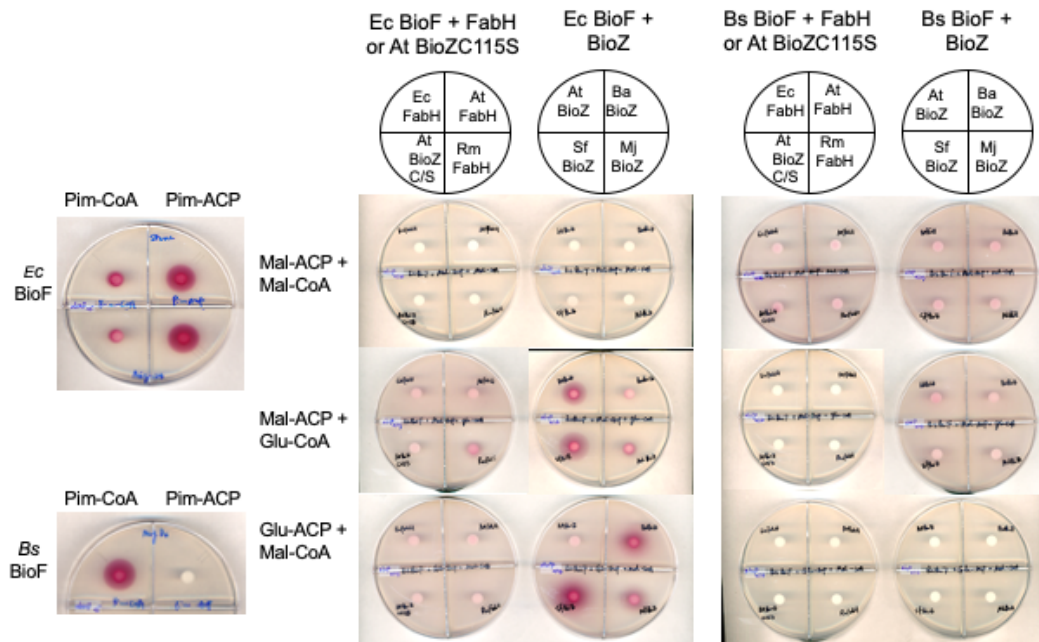

**Supplementary Fig. 4 The BioZ product formed *in vitro* is pimeloyl-ACP**

KAPA (7-oxo-8-aminopelargonic acid), the first intermediate in synthesis of the heterocyclic rings of biotin, is synthesized by a pyridoxal 5'-phosphate-dependent condensation of pimeloyl-CoA or pimeloyl-ACP with L-alanine accompanied by decarboxylation of L-alanine and release of the thiol moiety<sup>7</sup>. Previous studies have shown that *B. subtilis* BioF specifically accepts only pimeloyl-CoA as acyl donor whereas pimeloyl-ACP is inactive both *in vivo* and *in vitro*<sup>8</sup>. In contrast *E. coli* BioF accepts either of the pimeloyl-thioesters<sup>8</sup>. To determine whether the pimeloyl moiety formed by *in vitro* BioZ reactions is attached to CoA or to ACP, either *B. subtilis* BioF or *E. coli* BioF was used for *in vitro* pathway reconstitutions. KAPA synthesis was detected by bioassay using an *E. coli*  $\Delta bioF$  strain. KAPA formation was detected only in the reactions that contained *E. coli* BioF, indicating that the *in vitro* BioZ reaction product is pimeloyl-ACP.

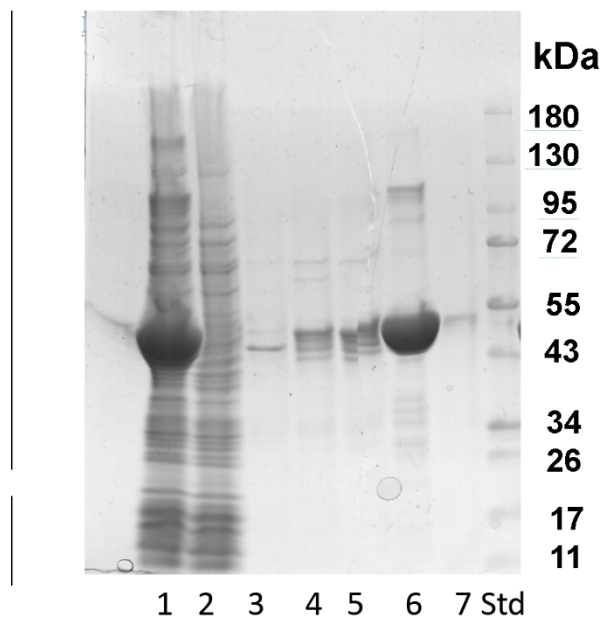

**Supplementary Fig. 5 *A. tumefaciens* CaiB purification**

Sodium dodecyl sulfate gels of steps in the standard purification protocol (Material and Methods) of *A. tumefaciens* CaiB. Lane 1, Induced crude extract; lane 2 column flow through. Lanes 3-6 progressive elution of the column with increasing imidazole concentrations as in Supplementary Figure 2. The right-hand lane is the molecular weight standard. The purification was performed twice with excellent yields.

## References.

1. Lin S, Hanson RE, Cronan JE. Biotin synthesis begins by hijacking the fatty acid synthetic pathway. *Nat Chem Biol* **6**, 682-688 (2010).
2. Lin S. Biotin synthesis in *Escherichia coli* Ph.D. Thesis, University of Illinois, Urbana-Champaign (2018)
3. Jiang Y, Morgan-Kiss RM, Campbell JW, Chan CH, Cronan JE. Expression of *Vibrio harveyi* acyl-ACP synthetase allows efficient entry of exogenous fatty acids into the *Escherichia coli* fatty acid and lipid A synthetic pathways. *Biochemistry* **49**, 718-726 (2010).
4. Cronan JE, Thomas J. Bacterial fatty acid synthesis and its relationships with polyketide synthetic pathways. *Methods Enzymol* **459**, 395-433 (2009).
5. Choi-Rhee E, Cronan JE. A nucleosidase required for in vivo function of the S-adenosyl-L-methionine radical enzyme, biotin synthase. *Chem Biol* **12**, 589-593 (2005).
6. Feng Y, Zhang H, Cronan JE. Profligate biotin synthesis in alpha-proteobacteria - a developing or degenerating regulatory system? *Mol Microbiol* **88**, 77-92 (2013).
7. Mann S, Ploux O. Pyridoxal-5'-phosphate-dependent enzymes involved in biotin biosynthesis: structure, reaction mechanism and inhibition. *Biochim Biophys Acta* **1814**, 1459-1466 (2011).
8. Manandhar M, Cronan JE. A canonical biotin synthesis enzyme, 8-amino-7-oxononanoate synthase (BioF), utilizes different acyl chain donors in *Bacillus subtilis* and *Escherichia coli*. *Appl Environ Microbiol* **84**, (2018).
